# Supplementary material
Source: publisher figshare collection journal article supplement (https://tandf.figshare.com/articles/dataset/_/12848832)
Supplement: Supplementary file 1 [file 1]

Techno-economic analysis of air-source heat pump (ASHP) technology for single-detached home heating applications in Canada

Artur Udovichenko and Lexuan Zhong\*

*Department of Mechanical Engineering, University of Alberta, 9211-116 street NW, Edmonton, AB, T6G 1H9, Canada*

\*Corresponding author e-mail: [lexuan.zhong@ualberta.ca](mailto:lexuan.zhong@ualberta.ca)

**Supplemental Materials**

Table A1. Characteristics of homes represented by data.

| <i>Component</i> | <i>Description</i> |
|------------------|--------------------|
| Foundation Type  | Basement           |
| Attachment       | Detached           |
| Roof Type        | Sloped Attic       |
| Occupancy        | Single-family      |
| Vintage Range    | 1900-2003          |
