# Supplementary material
Source: publisher figshare collection journal article supplement (https://tandf.figshare.com/articles/dataset/_/12848832)
Supplement: Supplementary file 2 [file 1]

a)

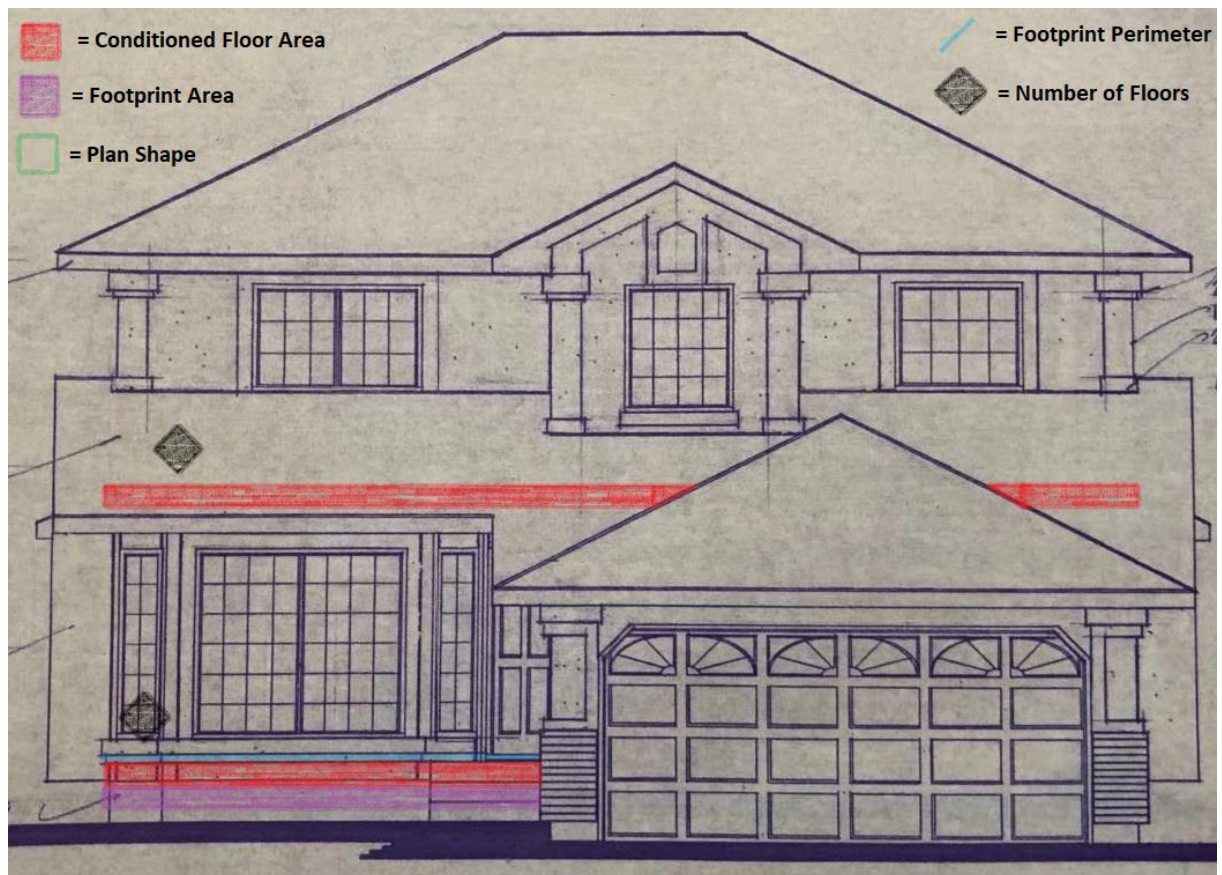

b)

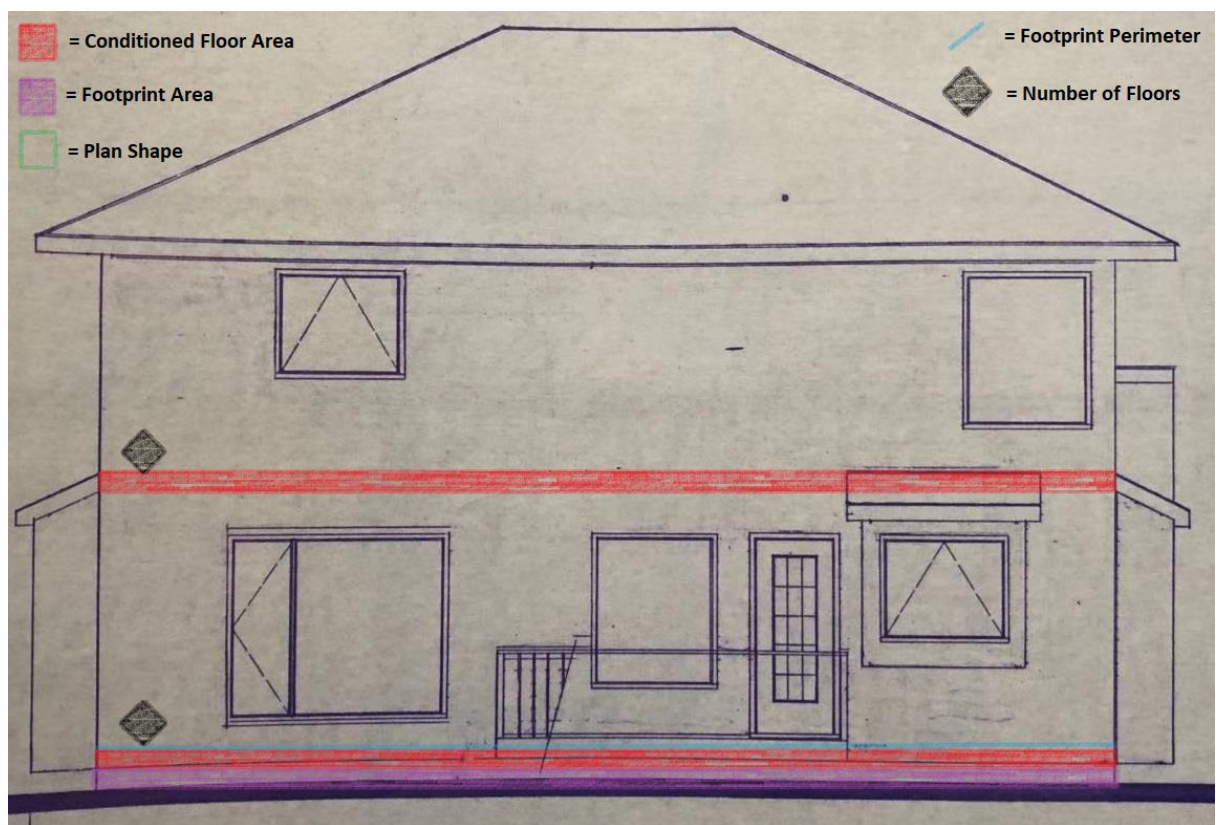



c)

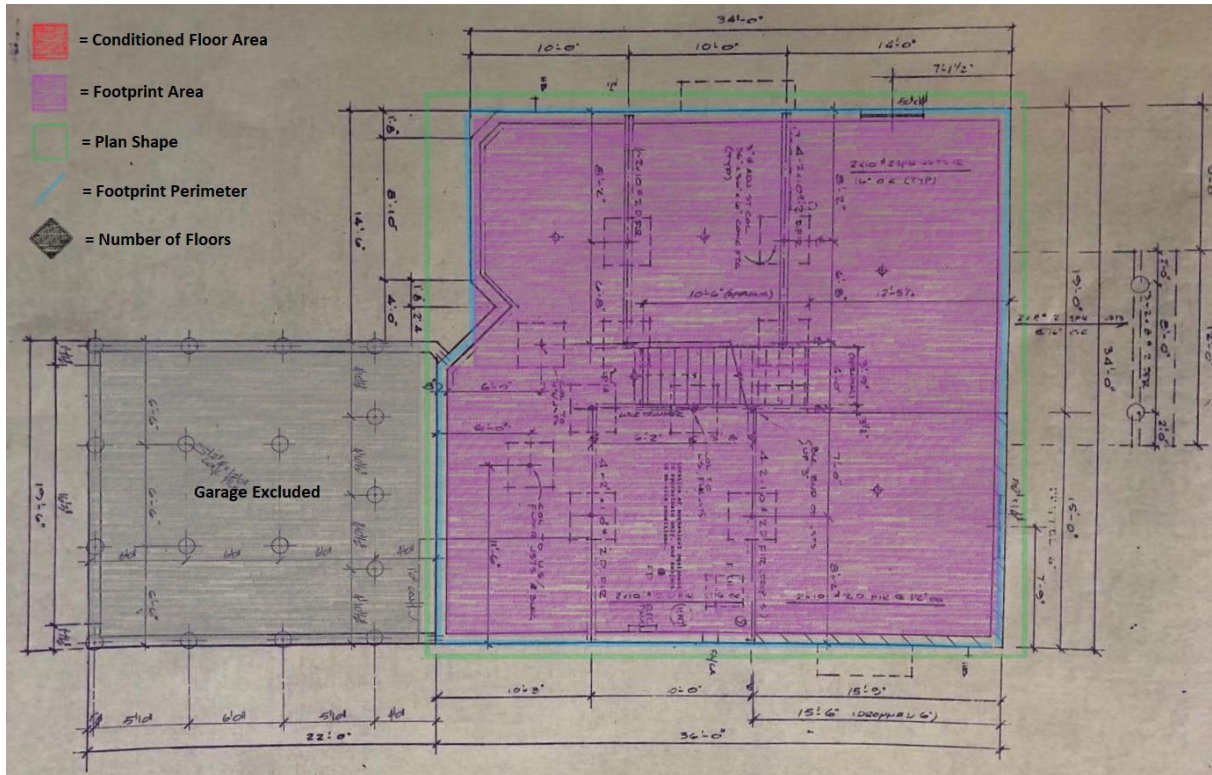

d)

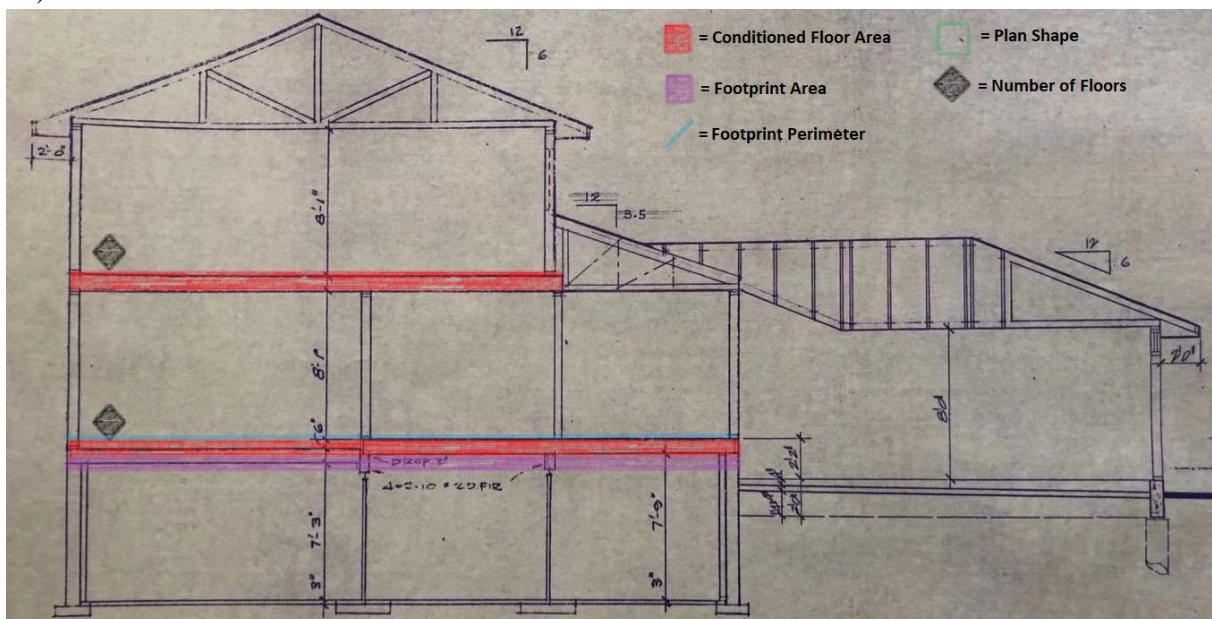

Figure A1(a-d). Architectural drawings of case study Edmonton home, with physical characteristics annotated.

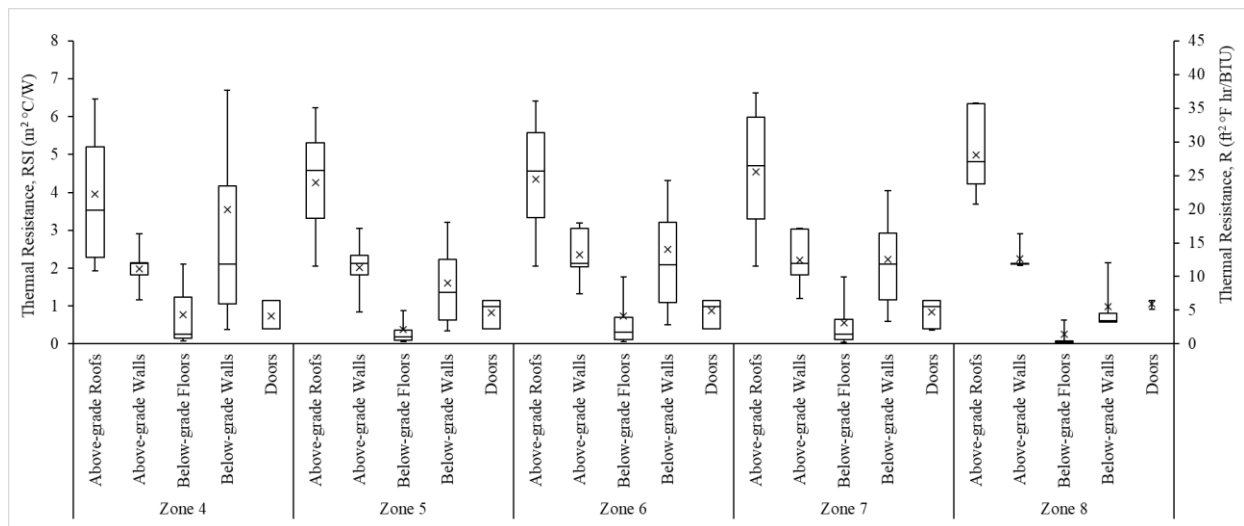

Figure A2. R-values of exposure components listed in the CSDDRD database. Boxes represent the 25<sup>th</sup>, 50<sup>th</sup>, and 75<sup>th</sup> percentiles; the whiskers represent the 10<sup>th</sup> and 90<sup>th</sup> percentiles, x marks the mean value.

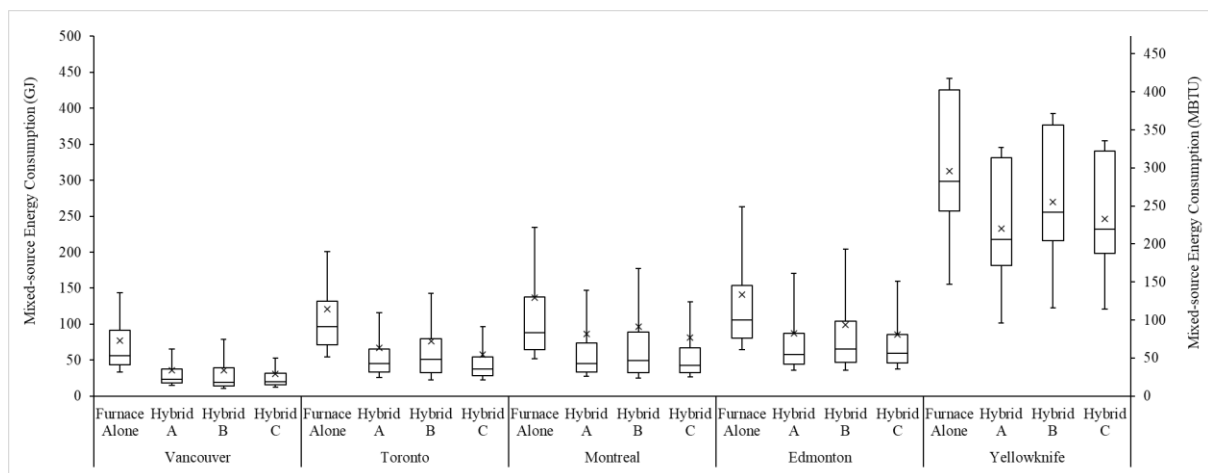

Figure A3. Annual space heating mixed-source end-user energy consumption of a single-detached home using different heating systems: furnace-alone system, hybrid A, hybrid B, and hybrid C. Boxes represent the 25<sup>th</sup>, 50<sup>th</sup>, and 75<sup>th</sup> percentiles, the whiskers represent the 10<sup>th</sup> and 90<sup>th</sup> percentiles, x marks the mean value.

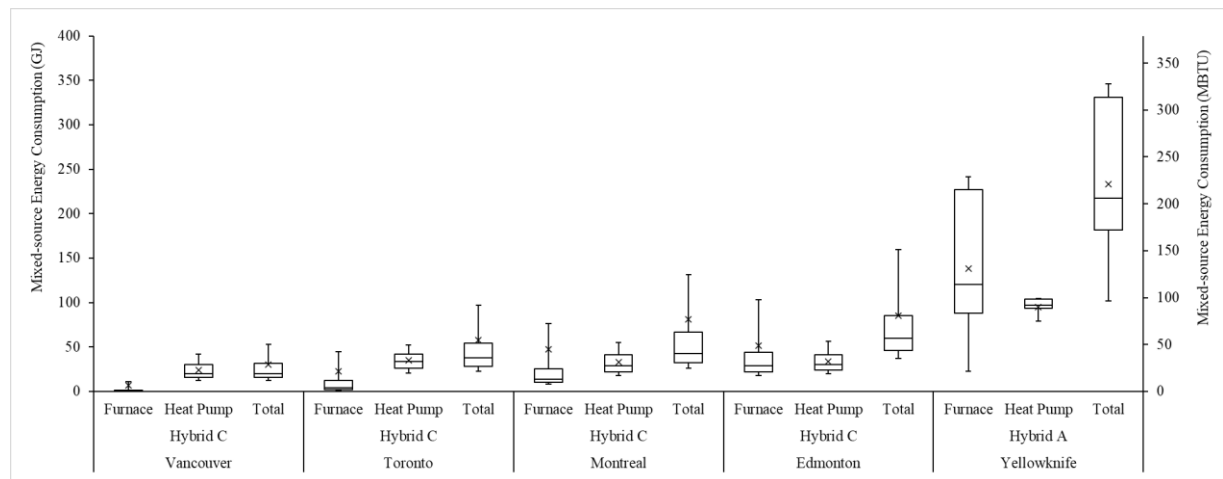

Figure A4. Breakdown of annual space heating mixed-source end-user energy consumption of a single-detached home using the best hybrid system in each city (natural gas furnace/ASHP-C in Vancouver, Toronto, Montreal, and Edmonton; oil furnace/ASHP-A in Yellowknife). Boxes represent the 25<sup>th</sup>, 50<sup>th</sup>, and 75<sup>th</sup> percentiles; the whiskers represent the 10<sup>th</sup> and 90<sup>th</sup> percentiles, x marks the mean value.
